# Supplementary material for: The suboptimal fibrinolytic response in COVID‐19 is dictated by high PAI‐1
Source: PubMed Central journal article supplement (PMC9349442; doi:10.1111/jth.15806), 2022-07-21
Supplement: JTH-9999-0-s001.pdf [file JTH-9999-0-s001.pdf]

### Supplemental Material

| Non-COVID-19 respiratory infection (24)  |    |
|------------------------------------------|----|
| LRTI/Pneumonia - Non-COVID-19            | 17 |
| Viral Respiratory illness - Non-COVID-19 | 3  |
| Aspiration Pneumonia                     | 2  |
| Exacerbation Asthma/COPD                 | 2  |

**Supplementary Table 1 – Breakdown of the type of Non-COVID-19 respiratory infections.** Lower respiratory tract infection (LRTI), chronic obstructive pulmonary disease (COPD).

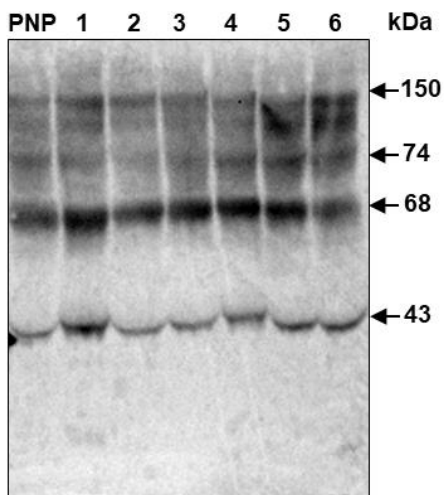

**Supplementary Figure 1 – PAI-1 – Vn complex detected by Western blotting.** COVID-19+ plasma samples (1-6) and pooled normal plasma (PNP) were separated on 4-12% NuPAGE Bis-Tris gels under non-reducing conditions, then transferred to PVDF membrane. PAI-1 was detected with polyclonal PAI-1 antibody (Affinity Biologicals) and donkey anti-sheep IgG conjugated to HRP (Sigma). Bands of PAI-1 protein were detected at 43, 68, 74 and 150 kDa.

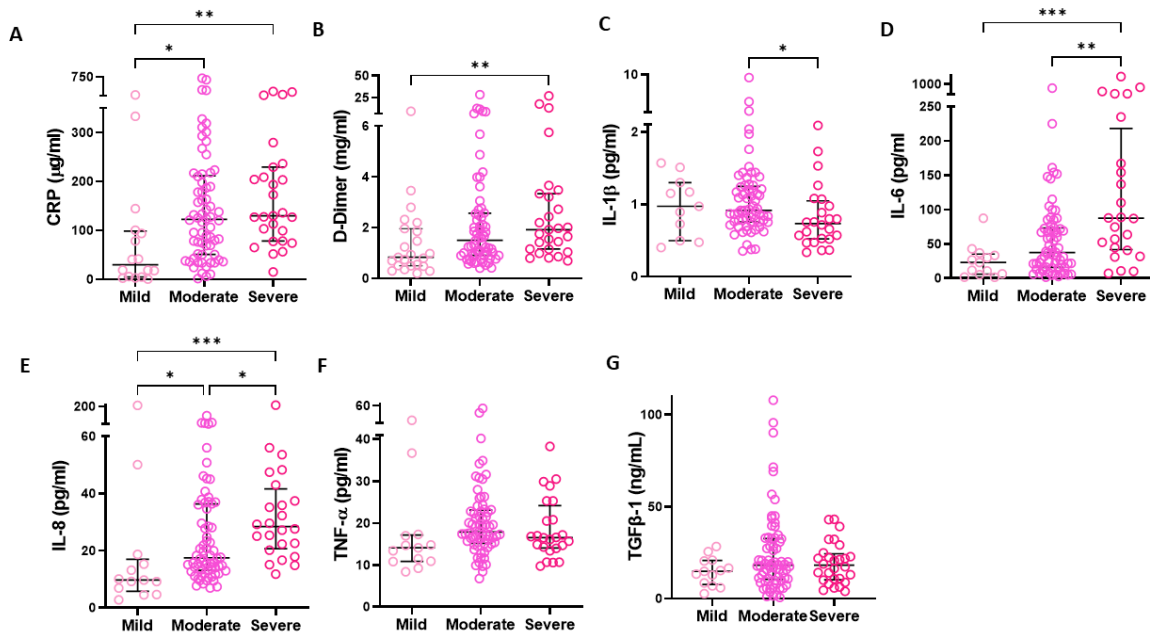

**Supplementary Figure 2 – Inflammatory markers and proinflammatory cytokines increase with COVID-19 disease severity.** Inflammatory markers were grouped according into the following groups of disease progression; mild = patients that did not require supplemental oxygen, moderate = patients on supplemental oxygen support or severe = patients on high flow nasal cannula (HFNC), continuous positive airway pressure (CPAP) or patients that were ventilated. (A) CRP antigen, (B) D-dimer, (C) IL-1 $\beta$ , (D) IL-6, (E) IL-8, (F) TNF- $\alpha$  and (G) TGF- $\beta$ 1. \*  $p < 0.05$ , \*\*  $p < 0.01$  and \*\*\*  $p < 0.001$ .

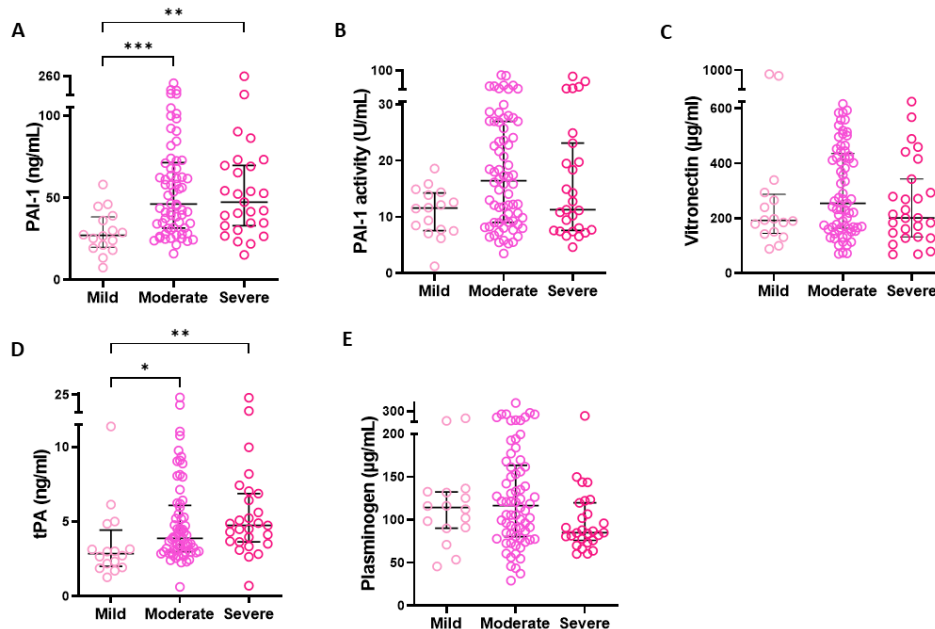

**Supplementary Figure 3 – PAI-1 and tPA increase with COVID-19 disease severity.** Fibrinolytic markers were grouped according to disease severity; mild = patients that did not require supplemental oxygen, moderate = patients on supplemental oxygen support or severe = patients on high flow nasal cannula (HFNC), continuous positive airway pressure (CPAP) or patients that were ventilated. (A) PAI-1 antigen, (B) PAI-1 activity, (C) vitronectin, (D) tPA antigen and (E) plasminogen. \*  $p < 0.05$ , \*\*  $p < 0.01$  and \*\*\*  $p < 0.001$ .

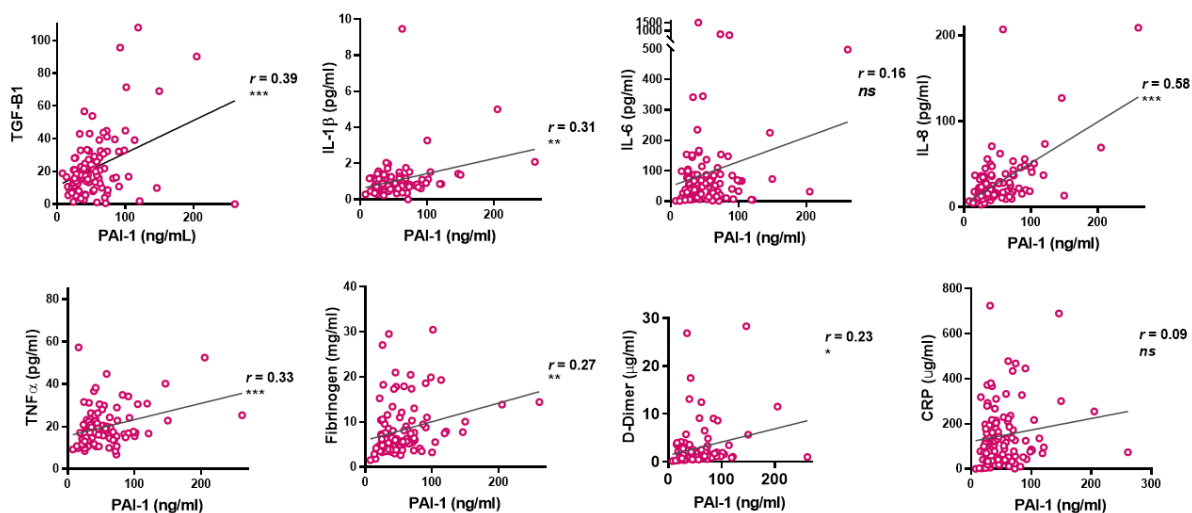

**Supplementary Figure 4 – PAI-1 correlates with inflammatory markers and proinflammatory cytokines.**

Pearson correlation coefficients ( $r$ ) were calculated between PAI-1 antigen and TGF- $\beta$ 1 - IL-1 $\beta$ , IL-6, IL-8 TNF- $\alpha$  fibrinogen, D-dimer and CRP. \*  $p < 0.05$ , \*\*  $p < 0.01$  and \*\*\*  $p < 0.001$ .

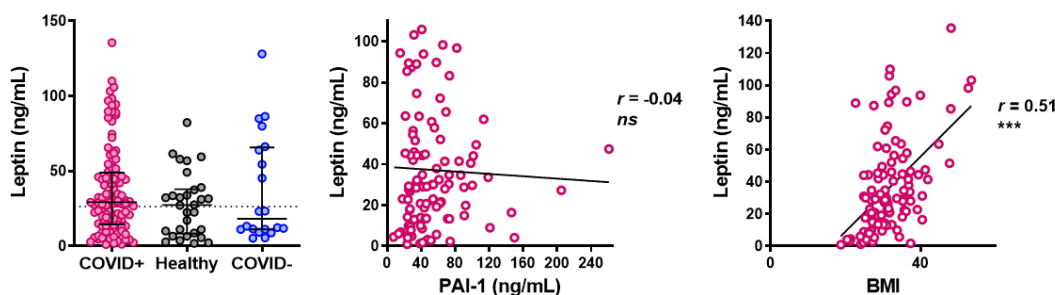

**Supplementary Figure 5 – Leptin plasma levels do not differ between COVID-19 positive and negative patients and does not correlate with PAI-1 levels.** (A) The concentration of leptin (ng/mL) was measured in plasma from patients with COVID-19 (COVID+), other non-COVID-19 respiratory infections (COVID-) and healthy controls by Simple Plex™ assays on Ella™. Dotted lines indicate antigen concentrations in pooled normal plasma. Data are shown as median  $\pm$  interquartile range (IQR). Correlations of leptin with (B) PAI-1 and (C) BMI. \*\*\*  $p < 0.001$ , ns = non-significant.

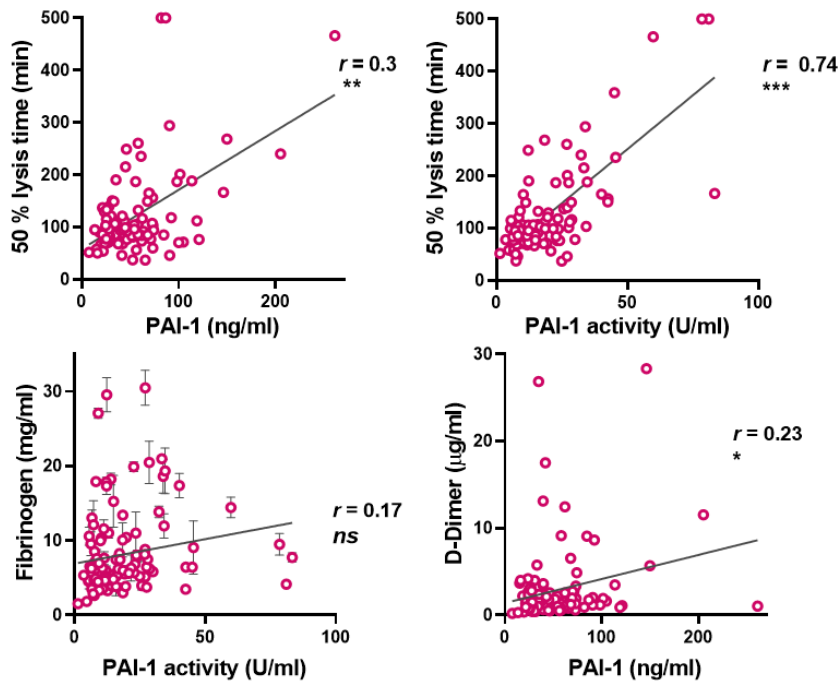

**Supplementary Figure 6 – PAI-1 correlates with fibrinolytic activity**

Pearson correlation coefficients ( $r$ ) were calculated between PAI-1 antigen or activity with tPA-mediated lysis and with fibrinogen and D-dimer and PAI-1 activity. \*  $p < 0.05$ , \*\*  $p < 0.01$  and \*\*\*  $p < 0.001$ .

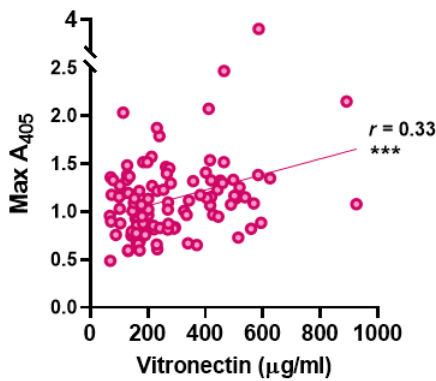

**Supplementary Figure 7 – Vitronectin levels correlate with plasma clot maximum absorbance.** Pearson correlation coefficients ( $r$ ) were calculated between vitronectin and plasma clot maximum absorbance at 405nm. \*\*\*  $p < 0.001$ .

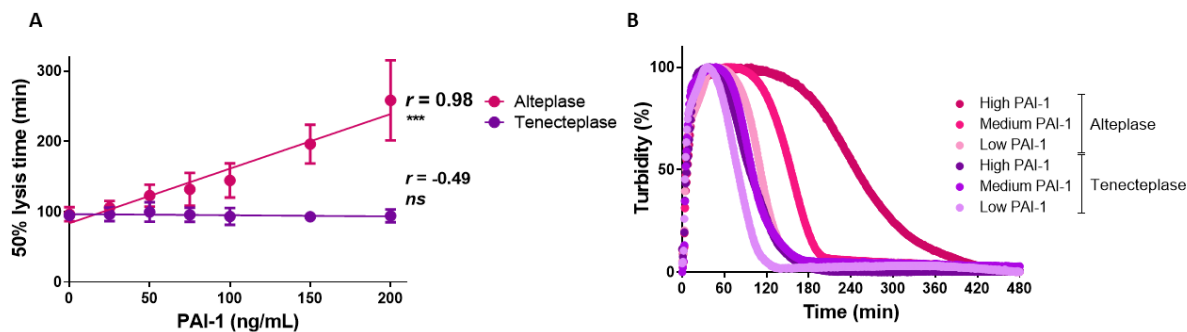

**Supplementary Figure 8 –PAI-1 delays clot lysis by Alteplase but not Tenecteplase.** Plasma clots (30 %) were formed in the presence of phospholipids (16 mM) ± Alteplase or Tenecteplase (300 pM). Clotting was initiated with CaCl<sub>2</sub> (10.6 mM) and thrombin (0.1 U/ml) and absorbance readings at 405 nm were taken every min for 8 h at 37 °C. (A) Purified PAI-1 was spiked into pooled plasma at 0, 25, 50, 75, 100, 150 and 200 ng/mL. Data show the median ± IQR time to 50 % lysis of plasma clots (n=4). The relationship between 50% lysis time and PAI-1 concentration was significantly different between the two plasminogen activators, Alteplase and Tenecteplase. \*\*\*  $p < 0.001$ . (B) Normalised clot lysis profiles of representative COVID-19 plasma with low <50 ng/mL [13.4-46.4 ng/mL]; medium 50-100 ng/mL [51.5 - 92.3 ng/mL] or high >100 ng/mL [103.3 - 260 ng/mL]) PAI-1 antigen (n=3 representative samples per PAI-1 grouping).
